# Supplementary material for: Pirtobrutinib versus venetoclax in covalent Bruton tyrosine kinase inhibitor-pretreated chronic lymphocytic leukemia: a matching-adjusted indirect comparison
Source: PubMed Central journal article supplement — Haematologica. 2023 Nov 30;109(6):1866–73. doi: 10.3324/haematol.2023.284150 (PMC11141664; doi:10.3324/haematol.2023.284150), 2023-11-30
Supplement: 2023_284150_AL-SAWAF_SUPPL.pdf [file 2023_284150_AL-SAWAF_SUPPL.pdf]

# Pirtobrutinib *versus* venetoclax in covalent Bruton tyrosine kinase inhibitor-pretreated chronic lymphocytic leukemia: a matching-adjusted indirect comparison

Othman Al-Sawaf,<sup>1,2,3</sup> Min-Hua Jen,<sup>4</sup> Lisa M Hess,<sup>5</sup> Jiewen Zhang,<sup>6</sup> Benjamin Goebel,<sup>7</sup> John M. Pagel,<sup>8</sup> Sarang Abhyankar,<sup>5</sup> Matthew S. Davids<sup>9</sup> and Toby A. Eyre<sup>10</sup>

<sup>1</sup>University of Cologne, Faculty of Medicine and University Hospital Cologne, Department of Internal Medicine, Center for Integrated Oncology Aachen Bonn Cologne Duesseldorf, Cologne, Germany; <sup>2</sup>Cancer Institute, University College London, London, UK; <sup>3</sup>Francis Crick Institute, London, UK; <sup>4</sup>Eli Lilly and Company, Bracknell, UK; <sup>5</sup>Eli Lilly and Company, Indianapolis, IN, USA; <sup>6</sup>TechDataServices, LLC, King of Prussia, PA, USA; <sup>7</sup>Eli Lilly and Company, Bad Homburg, Germany; <sup>8</sup>LOXO@Lilly, Indianapolis, IN, USA; <sup>9</sup>Department of Medical Oncology, Dana-Farber Cancer Institute, Boston, MA, USA and <sup>10</sup>Department of Hematology, Oxford University Hospitals NHS Foundation Trust, Oxford, UK

**Correspondence:** O. Al-Sawaf  
[othman.al-sawaf@uk-koeln.de](mailto:othman.al-sawaf@uk-koeln.de)

**Received:** August 23, 2023.

**Accepted:** November 20, 2023.

**Early view:** November 30, 2023.

<https://doi.org/10.3324/haematol.2023.284150>

©2024 Ferrata Storti Foundation

Published under a CC BY-NC license

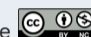

### ***Supplementary content: Sensitivity analyses***

An unanchored MAIC relies on the assumption of conditional constancy of relative effects and assume that the relative treatment effects are constant between studies.<sup>19</sup> Meeting this stringent assumption is extremely difficult for all MAIC analysis; therefore, to achieve reliable predictions, adjustment methods in these studies should account for all effect modifiers and prognostic variables.<sup>28</sup> Therefore, for the unanchored MAIC, unbalanced prognostic factors may contribute to the outcome and thus become confounders. As a result, it was crucial that all factors that directly or indirectly affect outcomes by impacting the effect the treatment has on that outcome (e.g., including even the non-effect-modifying prognostic factors) were balanced. The primary analysis utilized an informed covariate approach. To ensure that this did not introduce bias into the study findings, sensitivity analyses were conducted balancing the cohorts on all available baseline factors (the primary covariates listed above plus the additional covariates of ECOG performance status 0/1 versus 2, percent of patients with bulky disease, and patient sex) to evaluate the potential impact of informed versus uninformed covariate selection. Additional sensitivity analyses were conducted in the case of the identification of extreme weights, where those patients were excluded, and analyses were re-run for each efficacy outcome.

### Supplementary Table 1. Search strategy terms used to identify trials of venetoclax

A systematic literature review was conducted in MedLine, EMBASE, EBM Reviews, clinicaltrials.gov, and a series of conference proceedings through June 2022. Studies were included in this review if they enrolled patients with CLL who had prior cBTKi exposure, and if at least one clinical outcome of overall survival (OS), PFS, or tumor response (including ORR) were reported.

| S.No. | Search strings                                                                                                                                                                                                                                                                                                                                        |
|-------|-------------------------------------------------------------------------------------------------------------------------------------------------------------------------------------------------------------------------------------------------------------------------------------------------------------------------------------------------------|
| 1.    | lymphoma, non-hodgkin/                                                                                                                                                                                                                                                                                                                                |
| 2.    | (chronic lymphocytic leukemia or chronic lymphocytic leukaemia).mp.                                                                                                                                                                                                                                                                                   |
| 3.    | chronic lymphatic leukemia.mp.                                                                                                                                                                                                                                                                                                                        |
| 4.    | (chronic lymphocytic or CLL).mp.                                                                                                                                                                                                                                                                                                                      |
| 5.    | (small lymphocytic lymphoma or small-lymphocytic lymphoma).mp.                                                                                                                                                                                                                                                                                        |
| 6.    | small lymphocytic lymphoma.mp.                                                                                                                                                                                                                                                                                                                        |
| 7.    | (small lymphocytic or SLL).mp.                                                                                                                                                                                                                                                                                                                        |
| 8.    | ((chronic or small) adj3 (lymph* or leuk* or NHL)).mp.                                                                                                                                                                                                                                                                                                |
| 9.    | (chronic lymphocytic leukemia or small lymphocytic lymphoma).mp.                                                                                                                                                                                                                                                                                      |
| 10.   | 1 or 2 or 3 or 4 or 5 or 6 or 7 or 8 or 9                                                                                                                                                                                                                                                                                                             |
| 11.   | exp salvage therapy/                                                                                                                                                                                                                                                                                                                                  |
| 12.   | ((salvage adj3 (chemotherap* or treatment* or therap*)) or (resistant adj3 (chemotherap* or treatment resistant))).mp.                                                                                                                                                                                                                                |
| 13.   | (second line or 2nd line or 2?nd line or second-line or (second adj4 line)).ti,ab.                                                                                                                                                                                                                                                                    |
| 14.   | (third line or third-line or 3?rd line or 3rd line or (third adj4 line)).ti,ab.                                                                                                                                                                                                                                                                       |
| 15.   | (refractory or refractor* or relaps* or recurrent or (previously adj3 treated or previous* adj3 treat*) or (drug adj3 resistan*) or pre-treated or pretreated).ti,ab.                                                                                                                                                                                 |
| 16.   | ((failed or failure or discontinue or discontinu*) and (treatment* or therap* or prior or previous)).mp.                                                                                                                                                                                                                                              |
| 17.   | ((chemotherap* or treatment* or regime* or medication* or therap*) adj7 (refractory or recurrent or resistant or rescue or salvage or failed or failure)).mp.                                                                                                                                                                                         |
| 18.   | 11 or 12 or 13 or 14 or 15 or 16 or 17                                                                                                                                                                                                                                                                                                                |
| 19.   | 10 AND 18                                                                                                                                                                                                                                                                                                                                             |
| 20.   | Bruton Tyrosine Kinase inhibitor.mp.                                                                                                                                                                                                                                                                                                                  |
| 21.   | (bruton's tyrosine kinase inhibitor or bruton tyrosine kinase inhibitor or bruton s tyrosine kinase inhibitor or inhibitor of bruton s tyrosine kinase inhibitor or inhibitor of bruton's tyrosine kinase inhibitor or inhibitor of bruton tyrosine kinase inhibitor or BTK inhibitors or BTKI or BTKi or BTKinhibitors or BTK?inhibitors or BTK).mp. |
| 22.   | exp Agammaglobulinaemia Tyrosine Kinase/                                                                                                                                                                                                                                                                                                              |
| 23.   | (ibrutinib or imbruvica or "cra 032765" or cra032765 or cra-032765 or "pci 32765" or pci32765 or "pci 32765-00" or "pci 32765 00" or pci3276500 or PC-32765 or PC32765 or "PC 32765").mp.                                                                                                                                                             |
| 24.   | (acalabrutinib or "calquence acp 196" or acp196 or acp-196 or Acp-196).mp.                                                                                                                                                                                                                                                                            |
| 25.   | (zanubrutinib or brukinsa or BGB-3111 or Bgb-3111 or "BGB 3111" or BGB3111).mp.                                                                                                                                                                                                                                                                       |
| 26.   | (Tirabrutinib or GS-4059 or Gs-4059 or "GS 4059" or GS4059 or ONO-4059 or Ono-4059 or ONO4059 or "ONO 4059").mp.                                                                                                                                                                                                                                      |

| S.No. | Search strings                                                                                                                                                                                                                                                                                                                                                                                                                                                        |
|-------|-----------------------------------------------------------------------------------------------------------------------------------------------------------------------------------------------------------------------------------------------------------------------------------------------------------------------------------------------------------------------------------------------------------------------------------------------------------------------|
| 27    | (pirtorutinib or LOXO-305 or "LOXO 305" or Loxo-305 or "Loxo 305" or LY-3527727 or "LY 3527727" or LY3527727 or RXC-005 or RXC005 or "RXC 005").mp.                                                                                                                                                                                                                                                                                                                   |
| 28    | 20 or 21 or 22 or 23 or 24 or 25 or 26 or 27                                                                                                                                                                                                                                                                                                                                                                                                                          |
| 29    | 19 AND 28                                                                                                                                                                                                                                                                                                                                                                                                                                                             |
| 30    | exp adolescent/ or exp child/ or exp infant/ or (infant disease* or childhood disease*).ti,ab,kf. or (adolescen* or babies or baby or boy? or boyfriend or boyhood or child* or girl? or infant* or juvenil* or kid? or minors or minors* or neonat* or neonat* or newborn* or new-born* or paediatric* or peadiatric* or pediatric* or perinat* or preschool* or puber* or pubescen* or school* or teen* or toddler? or underage? or under-age? or youth*).ti,ab,kf. |
| 31    | (Comment or Letter or Editorial or Case Reports or Review or Practice Guideline).pt.                                                                                                                                                                                                                                                                                                                                                                                  |
| 32    | (nonhuman or animal experiment or animal tissue or animal cell or animal model or in vitro study or in vitro or in vitro studies or in vitro technique or in vitro techniques).mp.                                                                                                                                                                                                                                                                                    |
| 33    | 29 not (30 or 31 or 32)                                                                                                                                                                                                                                                                                                                                                                                                                                               |
| 34    | (venetoclax or "BCL-2" or BCL2).ti.ab                                                                                                                                                                                                                                                                                                                                                                                                                                 |
| 35    | 33 and 34                                                                                                                                                                                                                                                                                                                                                                                                                                                             |

## Supplementary Table 2. Venetoclax trials identified in the literature review and eligibility assessment

A total of 14 publications representing 8 single-arm trials were identified.

| Citation                                                                                      | Population                                                               | Intervention                                                                | Outcomes                                         | Included or Excluded (with reason)                                                                         |
|-----------------------------------------------------------------------------------------------|--------------------------------------------------------------------------|-----------------------------------------------------------------------------|--------------------------------------------------|------------------------------------------------------------------------------------------------------------|
| Jones, Mato et al. 2018 <sup>9</sup><br>NCT02141282                                           | 91 patients who received venetoclax after ibrutinib                      | Venetoclax initiated at 20 mg daily, intra-patient ramp-up to 400 mg daily. | ORR/tumor response<br>DOR<br>PFS<br>OS<br>Safety | Included                                                                                                   |
| Anderson, Tan et al. 2017 <sup>28</sup><br>NCT01328626,<br>NCT01889186,<br>and/or NCT01682616 | 67 heavily pre-treated patients enrolled to various early phase trials   | Venetoclax (n=51 monotherapy; n=16 venetoclax+rituximab,)                   | Time to progression<br>Post-venetoclax outcomes  | Excluded (Data were combined between monotherapy and combined therapy regimens)                            |
| Blombery, Thompson et al. 2020; 2022 <sup>29,30</sup>                                         | 92/89 patients enrolled to various clinical trials                       | Venetoclax (trials not specified)                                           | BAX mutations                                    | Excluded (No efficacy or safety outcomes reported)                                                         |
| Coutre, Choi et al 2018 <sup>31</sup><br>NCT02141282                                          | 36 patients who received venetoclax after idelalisib                     | Venetoclax initiated at 20 mg daily, inpatient ramp-up to 400 mg daily.     | ORR/tumor response<br>MRD<br>Safety              | Excluded (same study as Jones et al, 2018 but limited to post-idelalisib which is not comparable to BRUIN) |
| Coutre, Wierda et al 2016 <sup>32</sup><br>NCT02141282                                        | 38 patients who received venetoclax after ibrutinib, 10 after idelalisib | Venetoclax initiated at 20 mg daily, inpatient ramp-up to 400 mg daily.     | ORR/tumor response<br>Safety                     | Excluded (Same study as Jones et al. 2018)                                                                 |
| Davids, Hallek et al 2018 <sup>33</sup><br>NCT01328626,<br>NCT01889186,<br>NCT02141282        | 350 patients enrolled to various phase 1/2 clinical trials               | 400 mg daily venetoclax monotherapy                                         | Safety                                           | Excluded (No efficacy outcomes reported)                                                                   |
| Jones, Mato et al. 2015 <sup>34</sup><br>NCT02141282                                          | 22 patients who received venetoclax after ibrutinib, 6 after idelalisib  | Venetoclax initiated at 20 mg daily, inpatient ramp-up to 400 mg daily.     | ORR/tumor response<br>Safety                     | Excluded (Same study as Jones et al. 2018)                                                                 |

|                                                                                                                       |                                                                                                                                   |                                                                                                                                                       |                                           |                                                                                 |
|-----------------------------------------------------------------------------------------------------------------------|-----------------------------------------------------------------------------------------------------------------------------------|-------------------------------------------------------------------------------------------------------------------------------------------------------|-------------------------------------------|---------------------------------------------------------------------------------|
| Jones, Choi et al 2016 <sup>35</sup>                                                                                  | 43 patients who received venetoclax after ibrutinib, 21 after idelalisib                                                          | Venetoclax initiated at 20 mg daily, inpatient ramp-up to 400 mg daily.                                                                               | ORR/tumor response<br>Safety              | Excluded (Same study as Jones et al. 2018)                                      |
| Jones, Wierda et al 2016 <sup>36</sup>                                                                                | 41 patients who received venetoclax after ibrutinib, 13 after idelalisib                                                          | Venetoclax initiated at 20 mg daily, inpatient ramp-up to 400 mg daily.                                                                               | ORR/tumor response<br>Safety              | Excluded (Same study as Jones et al. 2018)                                      |
| Murayama, Izutsu et al 2021 <sup>37</sup><br>NCT0226573                                                               | 12 Japanese patients with R/R CLL/SLL                                                                                             | Patients enrolled in phase 1 received 400 mg/day venetoclax monotherapy. Patients enrolled in phase 2 received 400 mg/day venetoclax, plus rituximab. | ORR in phase 2 only<br>Safety             | Excluded (Phase 1 data only for venetoclax monotherapy)                         |
| Roberts, Seymour et al 2016 <sup>8,38</sup><br>NCT02141282,<br>NCT01 889186,<br>NCT01328626,<br>and/or<br>NCT01682616 | 387 patients enrolled to various phase 1/2 clinical trials                                                                        | Venetoclax monotherapy<br>Venetoclax + rituximab<br>Venetoclax doses ranged from 150 mg/day to 1200 mg/day                                            | ORR/tumor response<br>MRD<br>DOR<br>PFS   | Excluded (Data were combined between monotherapy and combined therapy regimens) |
| Roberts, Davis et al. 2016 <sup>39</sup><br>NCT01328626                                                               | 166 patients with R/R CLL                                                                                                         | Phase 1 dose escalation phase, phase 2 expansion phase-weekly stepwise ramp-up in doses as high as 400 mg per day                                     | ORR/response<br>Safety<br>PFS<br>DOR      | Excluded (Phase 1 data only for venetoclax monotherapy)                         |
| Stilginbauer, Eichorst et al 2016 <sup>40</sup><br>NCT01889186                                                        | 107 patients with R/R CLL                                                                                                         | Once daily venetoclax with a weekly dose ramp-up schedule (20, 50, 100, 200, 400 mg) over 4–5 weeks, ramp up to 400 mg daily                          | ORR/response<br>Safety<br>PFS<br>OS       | Excluded (Phase 1 data only for venetoclax monotherapy)                         |
| Wierda, Davids et al, 2017 <sup>41</sup>                                                                              | 28 patients who received venetoclax after more than one prior BCRi (including ibrutinib, idelalisib, and investigational agents). | Venetoclax initiated at 20 mg daily, inpatient ramp-up to 400 mg daily.                                                                               | ORR/tumor response<br>PFS<br>OS<br>Safety | Excluded (Same study as Jones et al. 2018)                                      |

MAIC=matching adjusted indirect comparison; CLL=chronic lymphocytic leukemia; ORR=objective response rate; DOR=duration of response; PFS=progression-free survival; OS=overall survival; BCRi = B-cell receptor pathway inhibitors

**Supplementary Table 3.** Prior therapies received by patients included in this analysis

| Prior Systemic Therapies, n (%) | <b>Venetoclax<br/>(N=91)</b> | <b>Pirtobrutinib<br/>(N=146)</b> |
|---------------------------------|------------------------------|----------------------------------|
| Prior BTK                       | 91 (100.0)                   | 146 (100.0)                      |
| Prior anti-CD20 Antibody        | Not reported                 | 120 (82.2)                       |
| Prior Chemotherapy              | Not reported                 | 108 (74.0)                       |
| Prior PI3K Agent                | 11 (12.1)                    | 17 (11.6)                        |
| Prior Lenalidomide              | Not reported                 | 11 (7.5)                         |
| Prior CAR-T                     | Not reported                 | 2 (1.4)                          |
| Other Systemic Therapy          | Not reported                 | 24 (16.4)                        |

**Supplementary Table 4.** Sensitivity analyses using all available baseline covariates

|                                                    | <b>Venetoclax<br/>(N=91)</b> | <b>Pirtobrutinib<br/>(unweighted)<br/>(N=146)</b> | <b>Unweighted OR/HR (95% CI), p-<br/>value</b> | <b>Pirtobrutinib<br/>(weighted)</b> | <b>Weighted OR/HR (95% CI), p-<br/>value</b> |
|----------------------------------------------------|------------------------------|---------------------------------------------------|------------------------------------------------|-------------------------------------|----------------------------------------------|
| <b>Clinical outcomes</b>                           |                              |                                                   |                                                |                                     |                                              |
| ORR (%)                                            | 64.8                         | 69.9                                              | 1.26 (0.69-2.27), p = 0.47                     | 84.2                                | 2.88 (1.46-5.76), p = 0.001                  |
| PFS, median (95% CI)<br>months                     | 24.7 (19.2 -<br>NE)          | 22.1 (19.5 -<br>NE)                               | 1.06 (0.70-1.61), p = 0.77                     | 19.4 (18.6 –<br>NE)                 | 1.15 (0.66-2.01), p=0.62                     |
| OS, median (95% CI)<br>months                      | NE (27.8 -<br>NE)            | NE (33.9 - NA)                                    | 0.78 (0.42-1.44), p = 0.43                     | NE (NE-NE)                          | 0.88 (0.34-2.29), p = 0.78                   |
| <b>Safety outcomes, grade ≥3 (%)</b>               |                              |                                                   |                                                |                                     |                                              |
| Anemia                                             | 28.6                         | 5.5                                               | 0.15 (0.05-0.35), p<0.001                      | 1.1                                 | 0.04 (0.00-0.16), p<0.001                    |
| Febrile neutropenia                                | 13.2                         | 1.4                                               | 0.09 (0.01-0.43), p < 0.001                    | 1.8                                 | 0.10 (0.01-0.47), p < 0.001                  |
| Neutropenia                                        | 50.5                         | 19.9                                              | 0.24 (0.13-0.45), p<0.001                      | 21.3                                | 0.26 (0.14-0.49), p<0.001                    |
| Thrombocytopenia                                   | 28.6                         | 1.4                                               | 0.04 (0.00-0.15), p<0.001                      | 1.8                                 | 0.04 (0.00-0.16), p<0.001                    |
| Pneumonia                                          | 6.6                          | 5.5                                               | 0.82 (0.24-2.98), p = 0.78                     | 0.8                                 | 0.11 (0.00-0.92), p = 0.02                   |
| Treatment discontinuation<br>due to adverse events | 6.6                          | 7.5                                               | 1.15 (0.37-3.95), p = 1.00                     | 2.6                                 | 0.44 (0.09-1.92), p = 0.32                   |

NE=not evaluable



**Supplementary Table 5.** Percent of patients with any grade treatment-emergent adverse events

|                     | <b>Venetoclax<br/>(N=91)</b> | <b>Pirtobrutinib<br/>(unweighted)<br/>(N=146)</b> | <b>Unweighted OR (95% CI), p-value</b> | <b>Pirtobrutinib<br/>(weighted)</b> | <b>Weighted OR (95% CI), p-value</b> |
|---------------------|------------------------------|---------------------------------------------------|----------------------------------------|-------------------------------------|--------------------------------------|
| Anemia              | 52.7                         | 11.0                                              | 0.11 (0.05-0.22), <0.001               | 5.1                                 | 0.05 (0.02-0.12), <0.001             |
| Febrile neutropenia | 13.2                         | 1.4                                               | 0.09 (0.01- 0.43), <0.001              | 1.4                                 | 0.10 (0.01 – 0.47), <0.001           |
| Neutropenia         | 61.5                         | 26.7                                              | 0.23 (0.13-0.41), <0.001               | 29.4                                | 0.26 (0.14 – 0.47), <0.001           |
| Thrombocytopenia    | 47.3                         | 3.4                                               | 0.04 (0.01 – 0.11), <0.001             | 2.3                                 | 0.03 (0.004 – 0.09), <0.001          |
| Pneumonia           | 11.0                         | 10.3                                              | 0.93 (0.37 – 2.43), 1.0                | 3.9                                 | 0.32 (0.08-1.07), 0.05               |

**Supplementary Table 6. Listing of number (%) of all adverse events reported similarly from both trials**

| n (%)                                                       | Venetoclax(n=91) |         |         |         |         | Pirtobrutinib (n=146) |         |         |         |           |
|-------------------------------------------------------------|------------------|---------|---------|---------|---------|-----------------------|---------|---------|---------|-----------|
|                                                             | Grade 1 or 2     | Grade 3 | Grade 4 | Grade 5 | Total   | Grade 1 or 2          | Grade 3 | Grade 4 | Grade 5 | Total     |
| <b>Blood and lymphatic system disorders</b>                 |                  |         |         |         |         |                       |         |         |         |           |
| Anaemia                                                     | 22 (24)          | 26 (29) | 0       | 0       | 48 (53) | 8(5.5)                | 8(5.5)  | 0(0.0)  | 0(0.0)  | 16(11.0)  |
| Febrile neutropenia                                         | 1 (1)            | 11 (12) | 0       | 0       | 12 (13) | 0(0.0)                | 2(1.4)  | 0(0.0)  | 0(0.0)  | 2 (1.4)   |
| Neutropenia                                                 | 10 (11)          | 18 (20) | 28 (31) | 0       | 56 (62) | 5(3.4)                | 6 (4.1) | 6 (4.1) | 0(0.0)  | 17(11.6)  |
| Thrombocytopenia                                            | 17 (19)          | 11 (12) | 15 (17) | 0       | 43 (47) | 3(2.1)                | 1 (0.7) | 1(0.7)  | 0(0.0)  | 5(3.4)    |
| <b>Cardiac Disorders</b>                                    |                  |         |         |         |         |                       |         |         |         |           |
| Atrial fibrillation                                         | 0                | 1 (1)   | 0       | 0       | 1 (1)   | 4(2.7)                | 1(0.7)  | 1(0.7)  | 0(0.0)  | 6(4.1)    |
| Myocardial infarction <sup>a</sup>                          | 0                | 1 (1)   | 0       | 0       | 1 (1)   | 0(0.0)                | 1 (0.7) | 0(0.0)  | 0(0.0)  | 1 (0.7)   |
| Pericardial effusion                                        | 0                | 1 (1)   | 0       | 0       | 1 (1)   | 1 (0.7)               | 0(0.0)  | 0(0.0)  | 0(0.0)  | 1 (0.7)   |
| <b>Ear and labyrinth disorders</b>                          |                  |         |         |         |         |                       |         |         |         |           |
| Cataract                                                    | 0                | 2 (2)   | 0       | 0       | 2 (2)   | 1 (0.7)               | 1 (0.7) | 0(0.0)  | 0(0.0)  | 2(1.4)    |
| <b>Gastrointestinal disorders</b>                           |                  |         |         |         |         |                       |         |         |         |           |
| Abdominal pain                                              | 15 (17)          | 4 (4)   | 0       | 0       | 19 (21) | 25(17.1)              | 2(1.4)  | 0(0.0)  | 0(0.0)  | 27(18.5)  |
| Constipation                                                | 19 (21)          | 0       | 0       | 0       | 19 (21) | 27(18.5)              | 1(0.7)  | 0(0.0)  | 0(0.0)  | 28(19.2)  |
| Diarrhoea                                                   | 41 (45)          | 6 (7)   | 0       | 0       | 47 (52) | 41(28.1)              | 1(0.7)  | 0(0.0)  | 0(0.0)  | 42(28.8)  |
| Dysphagia                                                   | 4 (4)            | 1 (1)   | 0       | 0       | 5 (6)   | 7(4.8)                | 0(0.0)  | 0(0.0)  | 0(0.0)  | 7(4.8)    |
| Haemorrhoids                                                | 3 (3)            | 1 (1)   | 0       | 0       | 4 (4)   | 4(2.7)                | 0(0.0)  | 0(0.0)  | 0(0.0)  | 4(2.7)    |
| Intestinal obstruction <sup>b</sup>                         | 0                | 1 (1)   | 0       | 0       | 1 (1)   | 0(0.0)                | 1(0.7)  | 0(0.0)  | 0(0.0)  | 1(0.7)    |
| Nausea                                                      | 51 (56)          | 1 (1)   | 0       | 0       | 52 (57) | 27(18.5)              | 0(0.0)  | 0(0.0)  | 0(0.0)  | 27(18.5)  |
| Small intestinal obstruction                                | 1 (1)            | 1 (1)   | 0       | 0       | 2 (2)   | 0(0.0)                | 1(0.7)  | 0(0.0)  | 0(0.0)  | 1(0.7)    |
| Stomatitis                                                  | 8 (9)            | 1 (1)   | 0       | 0       | 9 (10)  | 1(0.7)                | 0(0.0)  | 0(0.0)  | 0(0.0)  | 1(0.7)    |
| Vomiting                                                    | 20 (22)          | 1 (1)   | 0       | 0       | 21 (23) | 12(8.2)               | 0(0.0)  | 0(0.0)  | 0(0.0)  | 12(8.2)   |
| <b>General disorders and administration site conditions</b> |                  |         |         |         |         |                       |         |         |         |           |
| Asthenia                                                    | 3 (3)            | 1 (1)   | 0       | 0       | 4 (4)   | 4(2.7)                | 0(0.0)  | 0(0.0)  | 0(0.0)  | 4(2.7)    |
| Chills                                                      | 10 (11)          | 1 (1)   | 0       | 0       | 11 (12) | 6(4.1)                | 1(0.7)  | 0(0.0)  | 0(0.0)  | 7(4.8)    |
| Fatigue                                                     | 33 (36)          | 4 (4)   | 2 (2)   | 0       | 39 (43) | 43(29.5)              | 1(0.7)  | 0(0.0)  | 0(0.0)  | 44(30.1)  |
| Multi-organ failure <sup>c</sup>                            | 0                | 0       | 0       | 1 (1)   | 1 (1)   | 0(0.0)                | 0(0.0)  | 1(0.7)  | 0(0.0)  | 1(0.7)    |
| Peripheral oedema                                           | 21 (23)          | 0       | 0       | 0       | 21 (23) | 3(2.1)                | 0(0.0)  | 0(0.0)  | 0(0.0)  | 3(2.1)    |
| Pyrexia                                                     | 17 (19)          | 1 (1)   | 0       | 0       | 18 (20) | 13 (8.9)              | 1 (0.7) | 0 (0.0) | 0 (0.0) | 14 (9.6)  |
| <b>Infections and infestations</b>                          |                  |         |         |         |         |                       |         |         |         |           |
| Bacteraemia                                                 | 0                | 1 (1)   | 0       | 0       | 1 (1)   | 1(0.7)                | 0(0.0)  | 1(0.7)  | 0(0.0)  | 2(1.4)    |
| Bronchitis                                                  | 5 (5)            | 1 (1)   | 0       | 0       | 6 (7)   | 3(2.1)                | 0(0.0)  | 0(0.0)  | 0(0.0)  | 3(2.1)    |
| Cellulitis                                                  | 2 (2)            | 3 (3)   | 0       | 0       | 5 (5)   | 3(2.1)                | 1(0.7)  | 0(0.0)  | 0(0.0)  | 4(2.7)    |
| Diverticulitis                                              | 2 (2)            | 1 (1)   | 0       | 0       | 3 (3)   | 1(0.7)                | 1(0.7)  | 0 (0.0) | 0(0.0)  | 2(1.4)    |
| Viral gastroenteritis                                       | 2 (2)            | 1 (1)   | 0       | 0       | 3 (3)   | 1(0.7)                | 0(0.0)  | 0(0.0)  | 0(0.0)  | 1(0.7)    |
| Laryngitis <sup>d</sup>                                     | 0                | 1 (1)   | 0       | 0       | 1 (1)   | 1(0.7)                | 0(0.0)  | 0(0.0)  | 0(0.0)  | 1(0.7)    |
| Pneumonia                                                   | 4 (4)            | 5 (5)   | 1 (1)   | 0       | 10 (11) | 7(4.8)                | 7(4.8)  | 0(0.0)  | 1(0.7)  | 15 (10.3) |
| Septic shock                                                | 0                | 0       | 0       | 1 (1)   | 1 (1)   | 0(0.0)                | 0(0.0)  | 2(1.4)  | 1(0.7)  | 3(2.1)    |
| Upper respiratory tract infection <sup>e</sup>              | 24 (26)          | 0       | 0       | 0       | 24 (26) | 31(21.2)              | 0(0.0)  | 0(0.0)  | 0(0.0)  | 31(21.2)  |
| Urinary tract infection                                     | 6 (7)            | 1 (1)   | 1 (1)   | 0       | 8 (9)   | 17(11.6)              | 4 (2.7) | 0(0.0)  | 0(0.0)  | 21(14.4)  |
| Staphylococcal wound infection <sup>f</sup>                 | 0                | 1 (1)   | 0       | 0       | 1 (1)   | 1(0.7)                | 0(0.0)  | 0(0.0)  | 0(0.0)  | 1(0.7)    |
| <b>Injury, poisoning, and procedural complications</b>      |                  |         |         |         |         |                       |         |         |         |           |
| Bruising <sup>g</sup>                                       | 15 (17)          | 0       | 0       | 0       | 15 (17) | 32 (21.9)             | 0(0.0)  | 0(0.0)  | 0(0.0)  | 32(21.9)  |
| Fall                                                        | 2 (2)            | 3 (3)   | 0       | 0       | 5 (6)   | 20(13.7)              | 0(0.0)  | 0(0.0)  | 0(0.0)  | 20(13.7)  |
| <b>Investigations</b>                                       |                  |         |         |         |         |                       |         |         |         |           |
| Increased alanine aminotransferase                          | 11 (12)          | 2 (2)   | 1 (1)   | 0       | 14 (15) | 2(1.4)                | 1 (0.7) | 0(0.0)  | 0(0.0)  | 3(2.1)    |
| Increased aspartate aminotransferase                        | 16 (18)          | 0       | 2 (2)   | 0       | 18 (20) | 5(3.4)                | 0(0.0)  | 0(0.0)  | 0(0.0)  | 5(3.4)    |
| Increased blood bilirubin                                   | 11 (12)          | 1 (1)   | 0       | 0       | 12 (13) | 8 (5.5)               | 1 (0.7) | 0(0.0)  | 0(0.0)  | 9 (6.2)   |
| Decreased lymphocyte count                                  | 9 (10)           | 11 (12) | 3 (3)   | 0       | 23 (25) | 1 (0.7)               | 0(0.0)  | 0(0.0)  | 0(0.0)  | 1 (0.7)   |
| Increased lymphocyte count                                  | 4 (4)            | 4 (4)   | 0       | 0       | 8 (9)   | 3 (2.1)               | 1 (0.7) | 0(0.0)  | 0(0.0)  | 4 (2.7)   |
| <b>Metabolism and nutrition disorders</b>                   |                  |         |         |         |         |                       |         |         |         |           |
| Dehydration                                                 | 6 (7)            | 2 (2)   | 0       | 0       | 8 (9)   | 1(0.7)                | 3(2.1)  | 0(0.0)  | 0(0.0)  | 4 (2.7)   |
| Hyperglycaemia                                              | 5 (5)            | 4 (4)   | 1 (1)   | 0       | 10 (11) | 4 (2.7)               | 1(0.7)  | 0(0.0)  | 0(0.0)  | 5 (3.4)   |
| Hyperkalaemia                                               | 13 (14)          | 1 (1)   | 0       | 0       | 14 (15) | 6 (4.1)               | 0(0.0)  | 0(0.0)  | 0(0.0)  | 6 (4.1)   |
| Hypermagnesaemia                                            | 1 (1)            | 1 (1)   | 0       | 0       | 2 (2)   | 1(0.7)                | 0(0.0)  | 0(0.0)  | 0(0.0)  | 1(0.7)    |
| Hyperphosphataemia                                          | 11 (12)          | 0       | 0       | 0       | 11 (12) | 2 (1.4)               | 0(0.0)  | 0(0.0)  | 0(0.0)  | 2 (1.4)   |
| Hyperuricaemia                                              | 12 (13)          | 0       | 0       | 0       | 12 (13) | 20 (13.7)             | 0(0.0)  | 0(0.0)  | 0(0.0)  | 20 (13.7) |
| Hypoalbuminaemia                                            | 13 (14)          | 2 (2)   | 0       | 0       | 15 (17) | 1(0.7)                | 0(0.0)  | 0(0.0)  | 0(0.0)  | 1(0.7)    |
| Hypokalaemia                                                | 15 (16)          | 5 (5)   | 0       | 0       | 20 (22) | 5 (3.4)               | 2(1.4)  | 0(0.0)  | 0(0.0)  | 7 (4.8)   |

|                                                         |         |         |       |   |         |           |         |         |         |           |
|---------------------------------------------------------|---------|---------|-------|---|---------|-----------|---------|---------|---------|-----------|
| Hyponatraemia                                           | 11 (12) | 6 (7)   | 0     | 0 | 17 (19) | 1 (0.7)   | 1 (0.7) | 0(0.0)  | 0(0.0)  | 2 (1.4)   |
| Hypophosphataemia                                       | 5 (5)   | 11 (12) | 1 (1) | 0 | 17 (19) | 2(1.4)    | 0(0.0)  | 0(0.0)  | 0(0.0)  | 2 (1.4)   |
| <b>Musculoskeletal and connective tissue disorders</b>  |         |         |       |   |         |           |         |         |         |           |
| Arthralgia                                              | 16 (18) | 0       | 0     | 0 | 16 (18) | 26 (17.8) | 1(0.7)  | 0(0.0)  | 0(0.0)  | 27 (18.5) |
| Arthritis                                               | 1 (1)   | 1 (1)   | 0     | 0 | 2 (2)   | 3 (2.1)   | 0 (0.0) | 0 (0.0) | 0 (0.0) | 3 (2.1)   |
| Back pain                                               | 16 (18) | 0       | 0     | 0 | 16 (18) | 26 (17.8) | 1(0.7)  | 0(0.0)  | 0(0.0)  | 27 (18.5) |
| Intervertebral disc protrusion                          | 0       | 1 (1)   | 0     | 0 | 1 (1)   | 3 (2.1)   | 1 (0.7) | 0(0.0)  | 0(0.0)  | 4 (2.7)   |
| Extremity pain                                          | 12 (13) | 0       | 0     | 0 | 12 (13) | 12 (8.2)  | 0(0.0)  | 0(0.0)  | 0(0.0)  | 12 (8.2)  |
| Spinal column stenosis                                  | 0       | 1 (1)   | 0     | 0 | 1 (1)   | 2 (1.4)   | 0(0.0)  | 0(0.0)  | 0(0.0)  | 2 (1.4)   |
| <b>Neoplasms benign, malignant, and unspecified</b>     |         |         |       |   |         |           |         |         |         |           |
| Prostate cancer                                         | 1 (1)   | 1 (1)   | 0     | 0 | 2 (2)   | 0(0.0)    | 1 (0.7) | 0(0.0)  | 0(0.0)  | 1 (0.7)   |
| Squamous cell carcinoma of skin                         | 5 (5)   | 1 (1)   | 0     | 0 | 6 (6)   | 1 (0.7)   | 0(0.0)  | 0(0.0)  | 0(0.0)  | 1 (0.7)   |
| <b>Nervous system disorders</b>                         |         |         |       |   |         |           |         |         |         |           |
| Dizziness                                               | 12 (13) | 0       | 0     | 0 | 12 (13) | 25 (17.1) | 0(0.0)  | 0(0.0)  | 0(0.0)  | 25 (17.1) |
| Headache                                                | 18 (20) | 1 (1)   | 0     | 0 | 19 (21) | 26 (17.8) | 0(0.0)  | 0(0.0)  | 0(0.0)  | 26 (17.8) |
| Spinal cord compression <sup>h</sup>                    | 0       | 1 (1)   | 0     | 0 | 1 (1)   | 1 (0.7)   | 0(0.0)  | 0(0.0)  | 0(0.0)  | 1 (0.7)   |
| Presyncope                                              | 2 (2)   | 0       | 1 (1) | 0 | 3 (3)   | 2 (1.4)   | 0(0.0)  | 0(0.0)  | 0(0.0)  | 2 (1.4)   |
| Syncope                                                 | 0       | 2 (2)   | 0     | 0 | 2 (2)   | 0(0.0)    | 3 (2.1) | 0(0.0)  | 0(0.0)  | 3 (2.1)   |
| <b>Renal and urinary disorders</b>                      |         |         |       |   |         |           |         |         |         |           |
| Acute kidney injury                                     | 2 (2)   | 1 (1)   | 0     | 0 | 3 (3)   | 0(0.0)    | 5 (3.4) | 1 (0.7) | 0 (0.0) | 6 (4.1)   |
| Nephrolithiasis                                         | 0       | 1 (1)   | 0     | 0 | 1 (1)   | 0(0.0)    | 1 (0.7) | 0(0.0)  | 0(0.0)  | 1 (0.7)   |
| <b>Respiratory, thoracic, and mediastinal disorders</b> |         |         |       |   |         |           |         |         |         |           |
| Cough                                                   | 24 (26) | 0       | 0     | 0 | 24 (26) | 41 (28.1) | 0(0.0)  | 0(0.0)  | 0(0.0)  | 41 (28.1) |
| Dyspnoea                                                | 12 (13) | 2 (2)   | 0     | 0 | 14 (15) | 25 (17.1) | 1 (0.7) | 0(0.0)  | 0(0.0)  | 26 (17.8) |
| Hypoxia                                                 | 0       | 4 (4)   | 0     | 0 | 4 (4)   | 1 (0.7)   | 2 (1.4) | 0(0.0)  | 0(0.0)  | 3 (2.1)   |
| Oropharyngeal pain                                      | 11 (12) | 0       | 0     | 0 | 11 (12) | 9 (6.2)   | 0(0.0)  | 0(0.0)  | 0(0.0)  | 9 (6.2)   |
| Pleural effusion                                        | 3 (3)   | 1 (1)   | 0     | 0 | 4 (4)   | 4 (2.7)   | 0(0.0)  | 1(0.7)  | 0(0.0)  | 5 (3.4)   |
| Pulmonary oedema                                        | 0       | 0       | 1 (1) | 0 | 1 (1)   | 1 (0.7)   | 0(0.0)  | 0(0.0)  | 0(0.0)  | 1 (0.7)   |
| Respiratory failure                                     | 0       | 0       | 1 (1) | 0 | 1 (1)   | 0(0.0)    | 0(0.0)  | 1 (0.7) | 1 (0.7) | 2 (1.4)   |
| Wheezing                                                | 3 (3)   | 1 (1)   | 0     | 0 | 4 (4)   | 2 (1.4)   | 0(0.0)  | 0(0.0)  | 0(0.0)  | 2 (1.4)   |
| <b>Skin and subcutaneous tissue disorders</b>           |         |         |       |   |         |           |         |         |         |           |
| Rash                                                    | 11 (12) | 0       | 0     | 0 | 11 (12) | 6 (4.1)   | 0(0.0)  | 0(0.0)  | 0(0.0)  | 6 (4.1)   |
| <b>Vascular disorders</b>                               |         |         |       |   |         |           |         |         |         |           |
| Hypertension                                            | 5 (5)   | 6 (7)   | 0     | 0 | 11 (12) | 21 (14.4) | 4(2.7)  | 0(0.0)  | 0(0.0)  | 25 (17.1) |
| Hypotension                                             | 1 (1)   | 1 (1)   | 0     | 0 | 2 (2)   | 3 (2.1)   | 3(2.1)  | 0(0.0)  | 0(0.0)  | 6 (4.1)   |

Pirtobrutinib reported as: <sup>a</sup>acute myocardial infarction; <sup>b</sup>large intestinal obstruction; <sup>c</sup>multiple organ dysfunction; <sup>d</sup>reflux laryngitis; <sup>e</sup>respiratory tract infection; <sup>f</sup>staphylococcal skin infection; <sup>g</sup>contusion; <sup>h</sup>nerve compression
